# Supplementary material for: Fine-scale geographic variations of rates of renal replacement therapy in northeastern France: Association with the socioeconomic context and accessibility to care
Source: PubMed Central journal article supplement (PMC7386572; doi:10.1371/journal.pone.0236698), 2020-07-28
Supplement: pone.0236698.s001.pdf [file pone.0236698.s001.pdf]

**S1 Table. Contextual indicators describing population health status, demographic and socioeconomic context, and health service characteristics for the 282 studied townships in France, with data sources.**

|                                          | <b>Variables</b><br>Indicators <sup>a</sup>                                                                                                                                                                                                                                                                                                                                                                                                                                                                                      | <b>Data sources</b><br>Year                                                                                                                                                |
|------------------------------------------|----------------------------------------------------------------------------------------------------------------------------------------------------------------------------------------------------------------------------------------------------------------------------------------------------------------------------------------------------------------------------------------------------------------------------------------------------------------------------------------------------------------------------------|----------------------------------------------------------------------------------------------------------------------------------------------------------------------------|
| <b>Population health status</b>          | <b>Mortality<sup>b</sup></b><br>- Comparative premature <sup>c</sup> mortality figure<br>- Comparative cardiovascular mortality figure<br>- Comparative diabetes-related mortality figure<br><b>Morbidity<sup>b</sup></b><br>- Comparative prevalence figure for all treated chronic illnesses<br>- Comparative prevalence figure for treated diabetes                                                                                                                                                                           | <b>Center for epidemiology of medical causes of death (CepiDC)</b><br>- 2012<br><br><b>National health insurance system (chronic conditions scheme database)</b><br>- 2012 |
| <b>Demographic-socioeconomic context</b> | <b>Place of birth</b><br>- Percentage of foreign-born population<br><b>Rurality</b><br>- Percentage of population living in a rural area<br><b>Educational level</b><br>- Percentage of population without high school diploma in the active population<br><b>Occupational class in the active population</b><br>- Percentage of blue-collar workers<br>- Percentage of managers and higher-level professionals<br><b>Professional activity</b><br>- Unemployment rate<br><b>Social deprivation</b><br>- FDep index <sup>d</sup> | <b>National Institute of Statistics and Economic Studies (INSEE)</b><br>- 2012                                                                                             |
| <b>Health services characteristics</b>   | <b>Geographic accessibility to primary care</b><br>- Local potential accessibility to general practitioner <sup>e</sup><br><br><b>Geographic accessibility to nephrologist and dialysis care</b><br>- Mean travel time to closest nephrologist<br>- Mean travel time to closest dialysis unit<br><b>Clinical practices in dialysis (district level measures)</b><br>- Median eGFR at RRT start<br>- Percentage of incident patients $\geq 85$ years old<br>- Percentage of incident patients who died within 3 months            | <b>Institute for Research and Information in Health Economics (IRDES)</b><br>- 2010<br><b>Renal Epidemiology and Information Network (REIN) Registry</b><br>- 2010-2014    |

eGFR = estimated glomerular filtration rate, RRT = renal replacement therapy

<sup>a</sup> all indicators were established at the township level, except those of medical practices in dialysis, which were available only at the district level.

<sup>b</sup> standard = French population in 2006.

<sup>c</sup> all deaths before age 65 years.

<sup>d</sup> French deprivation index, according to Rey et al [17].

<sup>e</sup> according to Barlet et al [18].
