# Supplementary material for: Fine-scale geographic variations of rates of renal replacement therapy in northeastern France: Association with the socioeconomic context and accessibility to care
Source: PubMed Central journal article supplement (PMC7386572; doi:10.1371/journal.pone.0236698), 2020-07-28
Supplement: pone.0236698.s002.pdf [file pone.0236698.s002.pdf]

**S2 Table. Stepwise procedure for the selection of the best-fit Bayesian model**

| <b>Step</b> | <b>Model</b>                                                 | <b>DIC</b> |
|-------------|--------------------------------------------------------------|------------|
| 1           | $\log R_i = \alpha$                                          | 2079.4     |
| 2           | $\log R_i = \alpha + U_i + V_i$                              | 1756.0     |
| 3           | Model 2 + median estimated GFR at RRT start                  | 1746.9     |
| 4           | Model 3 + prevalence of treated diabetes                     | 1736.0     |
| 5           | Model 4 + mean travel time to reach closest nephrologist     | 1723.5     |
| 6           | Model 5 + FDep index                                         | 1722.3     |
| 7           | Model 6 + percentage of incident patients 85 years and older | 1723.1     |
| 8           | Model 7 – ( $U_i + V_i$ )                                    | 1753.0     |

DIC=deviance information criterion

$R_i$ =relative risk in township i,  $\alpha$ =intercept,  $U_i$ =autocorrelation component in township i,

$V_i$ =heterogeneity component in township i
